# Supplementary material for: Particle-impact analysis of the degree of cluster formation of rutile nanoparticles in aqueous solution
Source: Royal Society of Chemistry journal article supplement (doi:10.1039/c6cp08531h), 2017-01-01
Supplement: c6cp08531h1.pdf [file c6cp08531h1.pdf]

## Electronic Supporting Information

# Particle-Impact Analysis of the Degree of Cluster Formation of Rutile Nanoparticles in Aqueous Solution

*Kenichi Shimizu<sup>1</sup>, Stanislav V. Sokolov<sup>1</sup>, Neil P. Young<sup>2</sup>, Richard G. Compton<sup>1\*</sup>*

<sup>1</sup>Department of Chemistry, Physical and Theoretical Chemistry Laboratory, Oxford

University, South Parks Road, Oxford, OX1 3QZ, United Kingdom

The logo of Oxford University, featuring the text 'OXFORD UNIVERSITY' in a stylized, gothic font.

<sup>2</sup>Department of Materials, Oxford University, Parks Road, OX1 3PH, United Kingdom

\*Corresponding author: [richard.compton@chem.ox.ac.uk](mailto:richard.compton@chem.ox.ac.uk)

1. Nanoparticle Tracking Analysis of the rutile particles

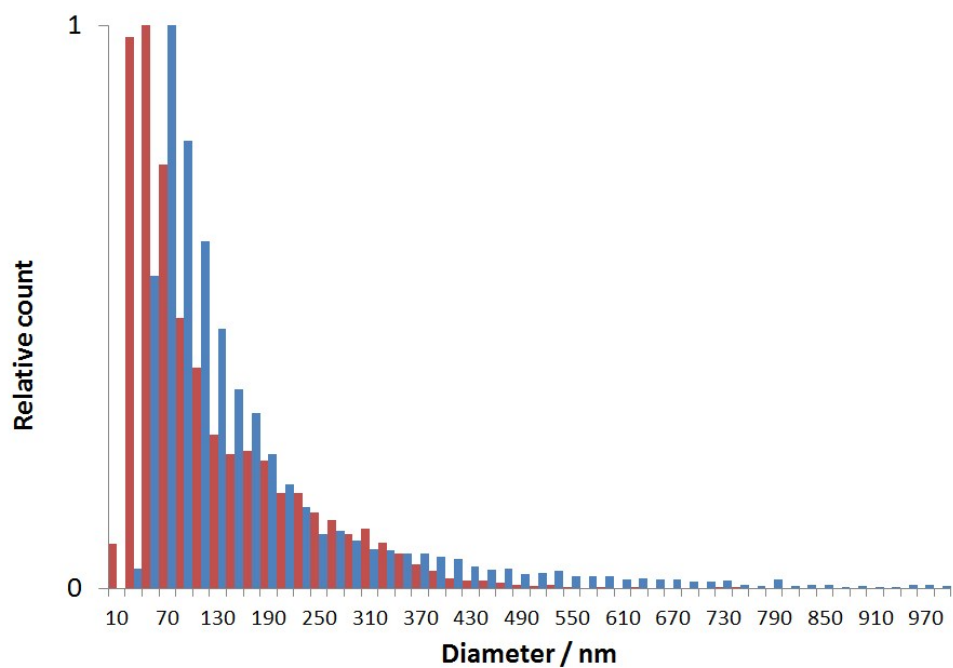

Figure S1: Size distributions obtained by nanoparticle tracking analysis for the Alizarin-red functionalised (blue histogram) and unfunctionalised (red histogram) particles
